# Supplementary material for: Serrate RNA Effector Molecule (SRRT) Is Associated with Prostate Cancer Progression and Is a Predictor of Poor Prognosis in Lethal Prostate Cancer
Source: MDPI journal article supplement (doi:10.3390/cancers15102867), 2023-05-22
Supplement: s1 [file s1]

## Supplemenatry Data

**Table S1.** Study group classification and OS and CSS variables.

| Group                 | N(%)       | OS Event<br>(all-cause mortality) | Median Followup          | Median Overall<br>Survival | p-value | Cause-<br>specific<br>survival<br>events | Median CSS              | p-value |
|-----------------------|------------|-----------------------------------|--------------------------|----------------------------|---------|------------------------------------------|-------------------------|---------|
| Incidental            | 182 (38.5) | 83                                | 59.10 (0.79 -<br>154.97) | 92.78 (71.51-<br>114.05)   | <0.0001 | 5                                        | NR                      | <0.0001 |
| Advanced              | 178 (37.6) | 139                               | 35.99 (0.30-147.55)      | 38.60 (31.04-<br>46.16)    |         | 80                                       | 63.97 (53.04-<br>74.89) |         |
| Castrate<br>Resistant | 113 (23.9) | 104                               | 16.00 (1.54-109.24)      | 16.23 (13.10-19.36)        |         | 81                                       | 18.53 (13.76-<br>23.30) |         |
| Overall               | 473        | 326                               | 39.06 (0.30-154.97)      | 42.48 (37.73- 7.22)        |         | 166                                      | NR                      |         |

NR No reported death.
